# Supplementary material for: Autophagy Is Involved in the Viability of Overexpressing Thioredoxin o1 Tobacco BY-2 Cells under Oxidative Conditions
Source: MDPI journal article supplement (doi:10.3390/antiox10121884), 2021-11-25
Supplement: s1 [file s1]

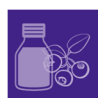

# Supplementary Material: Autophagy Is Involved in the Viability of Overexpressing Thioredoxin o1 Tobacco BY-2 Cells under Oxidative Conditions

Sabrina De Brasi-Velasco †, Omar López-Vidal †, María Carmen Martí, Ana Ortiz-Espín, Francisca Sevilla and Ana Jiménez \*

Department of Stress Biology and Plant Pathology, CEBAS-CSIC, 30100 Murcia, Spain; sdebrasi@cebas.csic.es (S.D.B.-V.); omalopez17@yahoo.com (O.L.-V.); mcmarti@cebas.csic.es (M.C.M.); anamaria.ortizespin@gmail.com (A.O.-E.); fsevilla@cebas.csic.es (F.S.)

\* Correspondence: ajimenez@cebas.csic.es

† These authors contributed equally to this work.

Table S1. Primers used in the qRT-PCR analysis.

| Gene           | Sequence                       | Strand  |
|----------------|--------------------------------|---------|
| <i>NtATG4f</i> | 5'-AAGAGAGAAGAAVGGGGAATG-3'    | Forward |
| <i>NtATG4r</i> | 5'-CCAACGGAAGTAAGAAAAGAACAG-3' | Reverse |
| <i>qACTf</i>   | 5'-TACAACGAGCTTCGTGTTGC-3'     | Forward |
| <i>qACTr</i>   | 5'-ACAAGGAAAGGACAGCCTGA-3'     | Reverse |

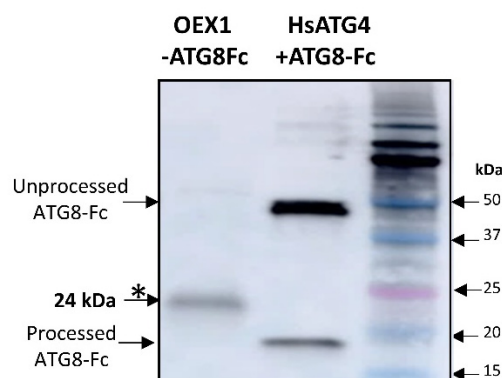

Figure S1. Control experiment for endogenous ATG4 processing activity of over-expressing *Pstrxo1* (OEX1) TBY-2 line 24 h after 35 mM H<sub>2</sub>O<sub>2</sub> treatment (treated cells (-T)). ATG4 activity of OEX1 cellular extract in the absence of the quimeric substrate His tag ATG8-Fc and positive control of activity of the recombinant HsATG4 monitored by following the cleavage of the substrate from the unprocessed (His ATG8-Fc) to the processed His-ATG8 by western blot analysis using anti-His antibody. Asterisk indicates the non-specific band at 24 kDa. Molecular mass markers (kDa) are indicated.

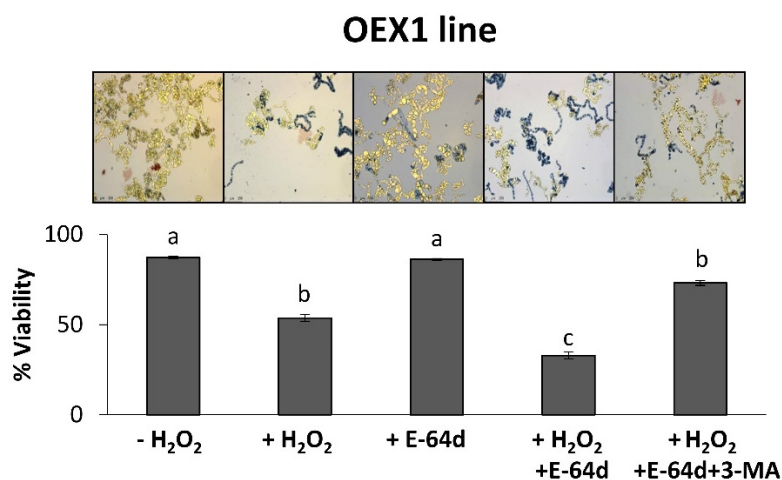

**Figure S2.** Cell viability of the *Pstrxo1* transformed TBY-2 line (OEX1) 48 h after 35 mM H<sub>2</sub>O<sub>2</sub> treatment in the absence and presence of the autophagy inhibitors E-64d and E-64 plus 3-MA. Cell viability (percentage) of overexpressing cells without treatment (-) and after treatment (+) with H<sub>2</sub>O<sub>2</sub>, E-64d, H<sub>2</sub>O<sub>2</sub> + E-64d, H<sub>2</sub>O<sub>2</sub> + E-64d + 3-MA was tested using the dye Trypan Blue 48 h after the respective treatments. Values represent mean  $\pm$  standard error of four independent experiments. Different letters indicate significant differences ( $P < 0.05$ ) among treatments according to Tukey's test.

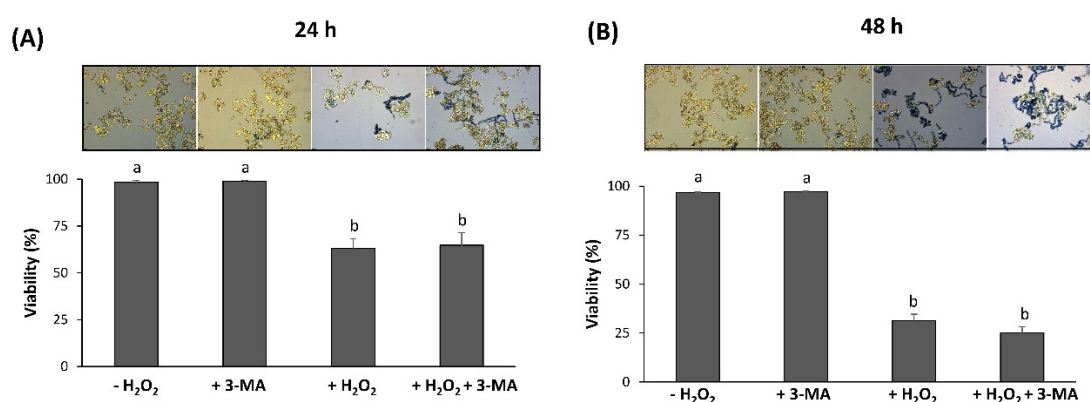

**Figure S3.** Cell viability of the *Pstrxo1* transformed TBY-2 line (OEX1) 24 h and 48 h after 35 mM H<sub>2</sub>O<sub>2</sub> treatment in the absence and presence of the autophagy inhibitor 3-MA. Cell viability (percentage) of overexpressing cells without treatment (-) and after treatment (+) with H<sub>2</sub>O<sub>2</sub>, 3-MA and H<sub>2</sub>O<sub>2</sub> + 3-MA was tested using the dye Trypan Blue 24 h (A) and 48 h (B) after the respective treatments. Values represent mean  $\pm$  standard error of three independent experiments.

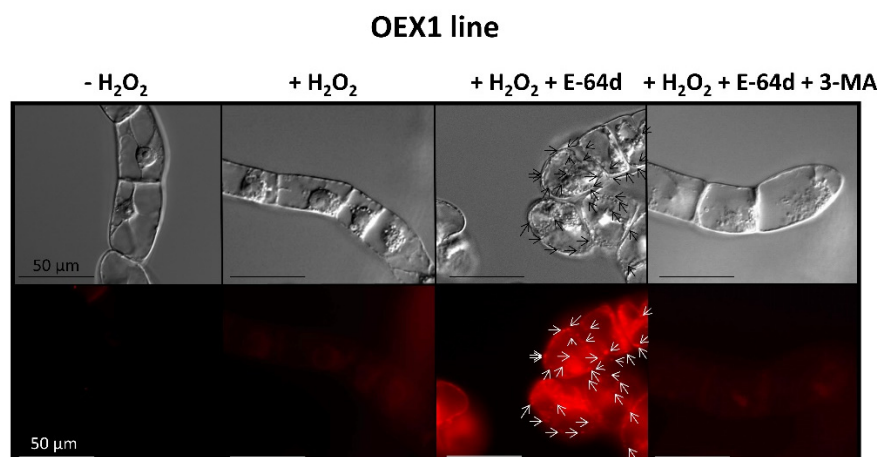

**Figure S4.** Visualization of  $\text{H}_2\text{O}_2$ -induced formation of autolysosomes in overexpressing *Pstrxo1* (OEX1) tobacco BY-2 cells 48 h after 35 mM  $\text{H}_2\text{O}_2$  treatment. Differential interference contrast (DIC) images and fluorescence images of LDR-dyed structures are shown as representative of three independent experiments. Five day-old TBV-2 cells were treated with 35 mM  $\text{H}_2\text{O}_2$  alone or in combination with E-64d or E-64d plus 3-MA and observed 48 h after under a fluorescence microscope equipped with a Nomarski optic. Arrows indicate some punctate signals of autolysosomes (red). Scale bars: 50  $\mu\text{m}$ .

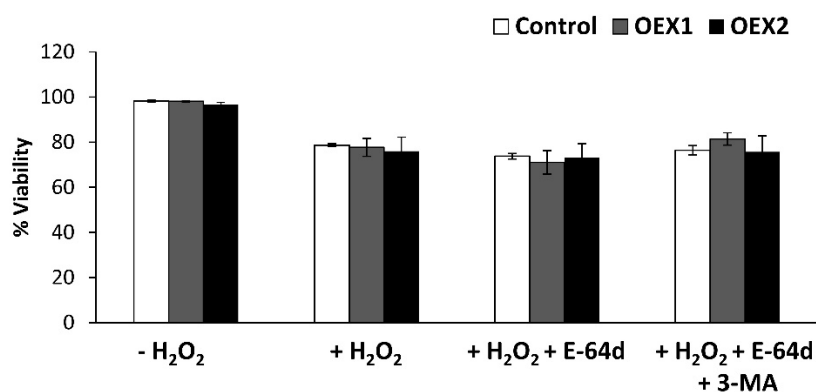

**Figure S5.** Cell viability of Control and two overexpressing *Pstrxo1* TBV-2 lines (OEX1 and OEX2) 2 h after 35 mM  $\text{H}_2\text{O}_2$  treatment in the absence and presence of the autophagy inhibitors E-64d and E-64d plus 3-MA. Cell viability (percentage) of cells without treatment (-) and after treatment (+) with  $\text{H}_2\text{O}_2$ , E-64d,  $\text{H}_2\text{O}_2$  + E-64d,  $\text{H}_2\text{O}_2$  + E-64d + 3-MA was tested using the dye Trypan Blue 2 h after the respective treatments. Values represent mean  $\pm$  standard error of four independent experiments.

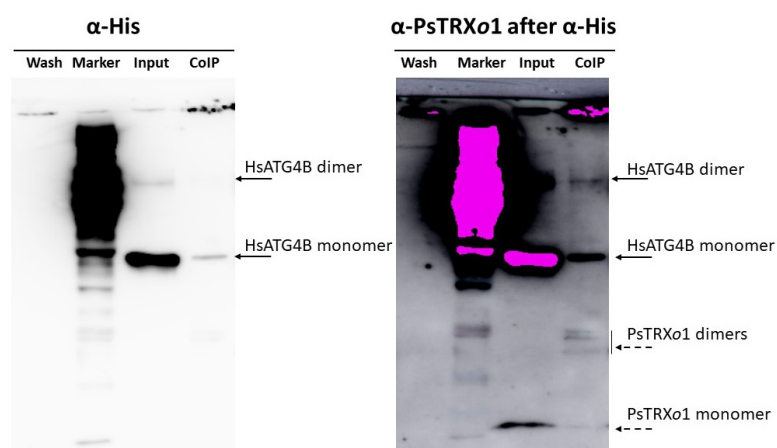

**Figure S6.** Western blot of the resulting Co-IP between His-HsATG4B and PsTRXo1 recombinant proteins revealed with anti-Histidine and then with anti-PsTRXo1 after mild stripping. Whole membranes corresponding to the images in Figure 11 (see legend for the description).
